# Supplementary material for: Competition alters predicted forest carbon cycle responses to nitrogen availability and elevated CO 2 : simulations using an explicitly competitive, game-theoretic vegetation demographic model
Source: Copernicus journal article supplement (doi:10.5194/bg-16-4577-2019), 2019-12-03
Supplement: Supplementary file 2 [file bg-16-4577-2019-supplement.zip]

**Supplementary Information II Supplementary figures**

**Competition alters predicted forest carbon cycle responses to nitrogen availability and elevated CO<sub>2</sub>: simulations using an explicitly competitive, game-theoretic vegetation demographic model**

Ensheng Weng<sup>1,2</sup>, Ray Dybzinski<sup>3</sup>, Caroline E. Farrior<sup>4</sup>, Stephen W. Pacala<sup>5</sup>

<sup>1</sup>Center for Climate Systems Research, Columbia University, New York, NY 10025

<sup>2</sup>NASA Goddard Institute for Space Studies, 2880 Broadway, New York, NY 10025

<sup>3</sup>Institute of Environmental Sustainability, Loyola University Chicago, Chicago, IL 60660

<sup>4</sup>Department of Integrative Biology, University of Texas at Austin, Austin, TX 78712

<sup>5</sup>Department of Ecology & Evolutionary Biology, Princeton University, Princeton, NJ 08544,

Email: [wengensheng@gmail.com](mailto:wengensheng@gmail.com); Phone: 212-678-5585

**Table of contents:**

**Figure S1 Monoculture runs at elevated [CO<sub>2</sub>] (580 ppm)**

**Figure S2 Successional patterns of polyculture runs I at ambient [CO<sub>2</sub>] (380 ppm)**

**Figure S3 Successional patterns of polyculture runs I at elevated [CO<sub>2</sub>] (580 ppm)**

**Figure S4 Successional patterns of polyculture runs II at ambient [CO<sub>2</sub>] (380 ppm)**

**Figure S5 Successional patterns of polyculture runs II at elevated [CO<sub>2</sub>] (580 ppm)**

**Figure S6 Non-structural carbon storage in monoculture and in polyculture runs at equilibrium state**

**Figure S7 Leaf area index in monoculture and in polyculture runs at equilibrium state**

**Figure S8 Critical height of mono- and poly-culture runs at the two [CO<sub>2</sub>] levels (380 ppm and 580 ppm)**

**Figure S9 Responses of transpiration to elevated [CO<sub>2</sub>] in monoculture and in polyculture runs**

**Figure S10 Mean annual transpiration in monoculture and in polyculture runs at equilibrium state**

**Figure S11 Water fluxes and soil moisture dynamics**

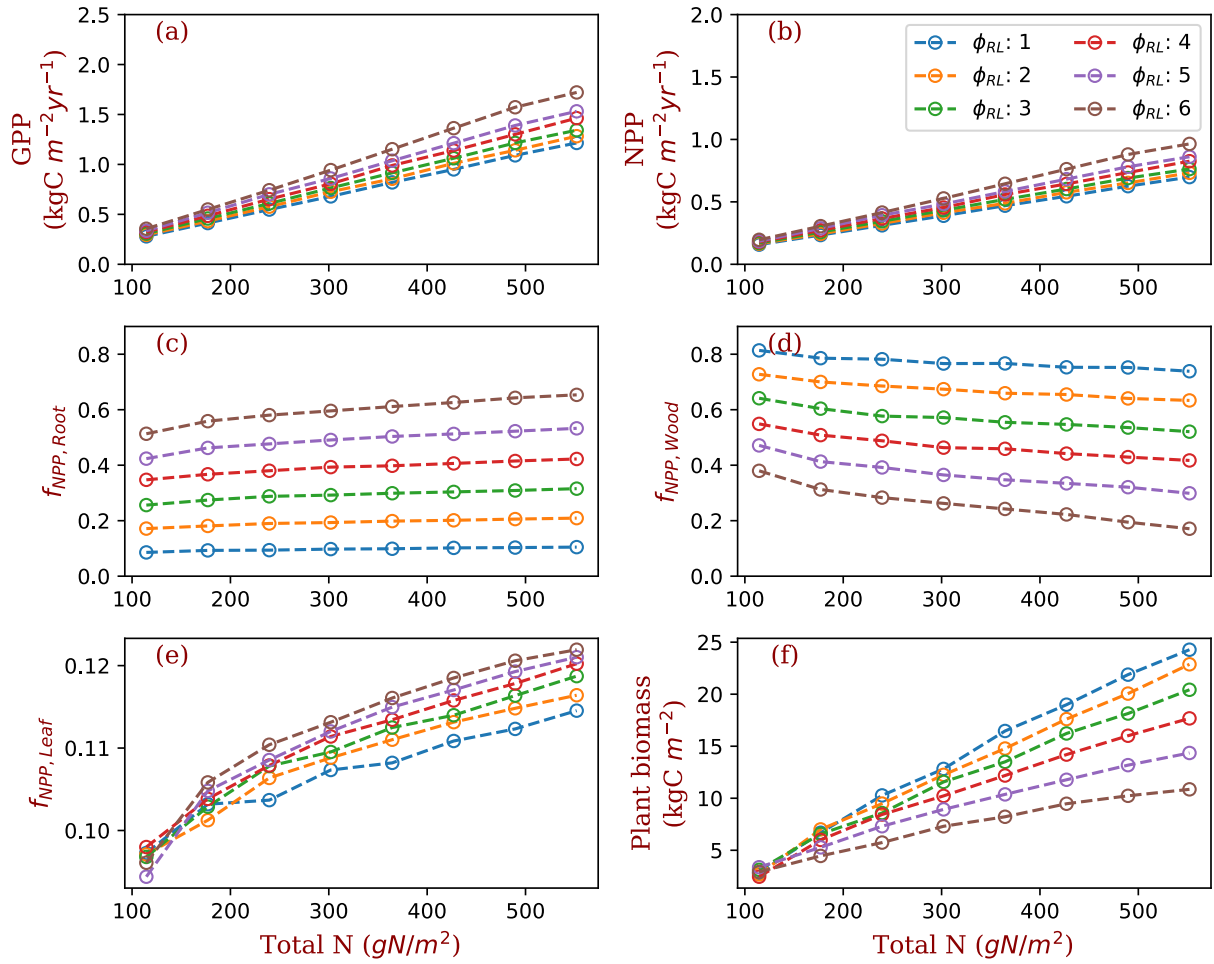

**Figure S1 Monoculture runs at elevated [CO<sub>2</sub>] (580 ppm).** GPP: Gross primary production; NPP: Net primary production;  $f_{NPP,x}$ : the fraction of NPP allocated to x, where x can be Root (fine roots), Leaf (leaves in crown), and Wood (including tree trunk, stems, and coarse roots). The data are from the averages of the model run years from 1400 and 1800. Each model run is initiated with one PFT with fixed ratio of fine root area to leaf area ( $\phi_{RL}$ ).

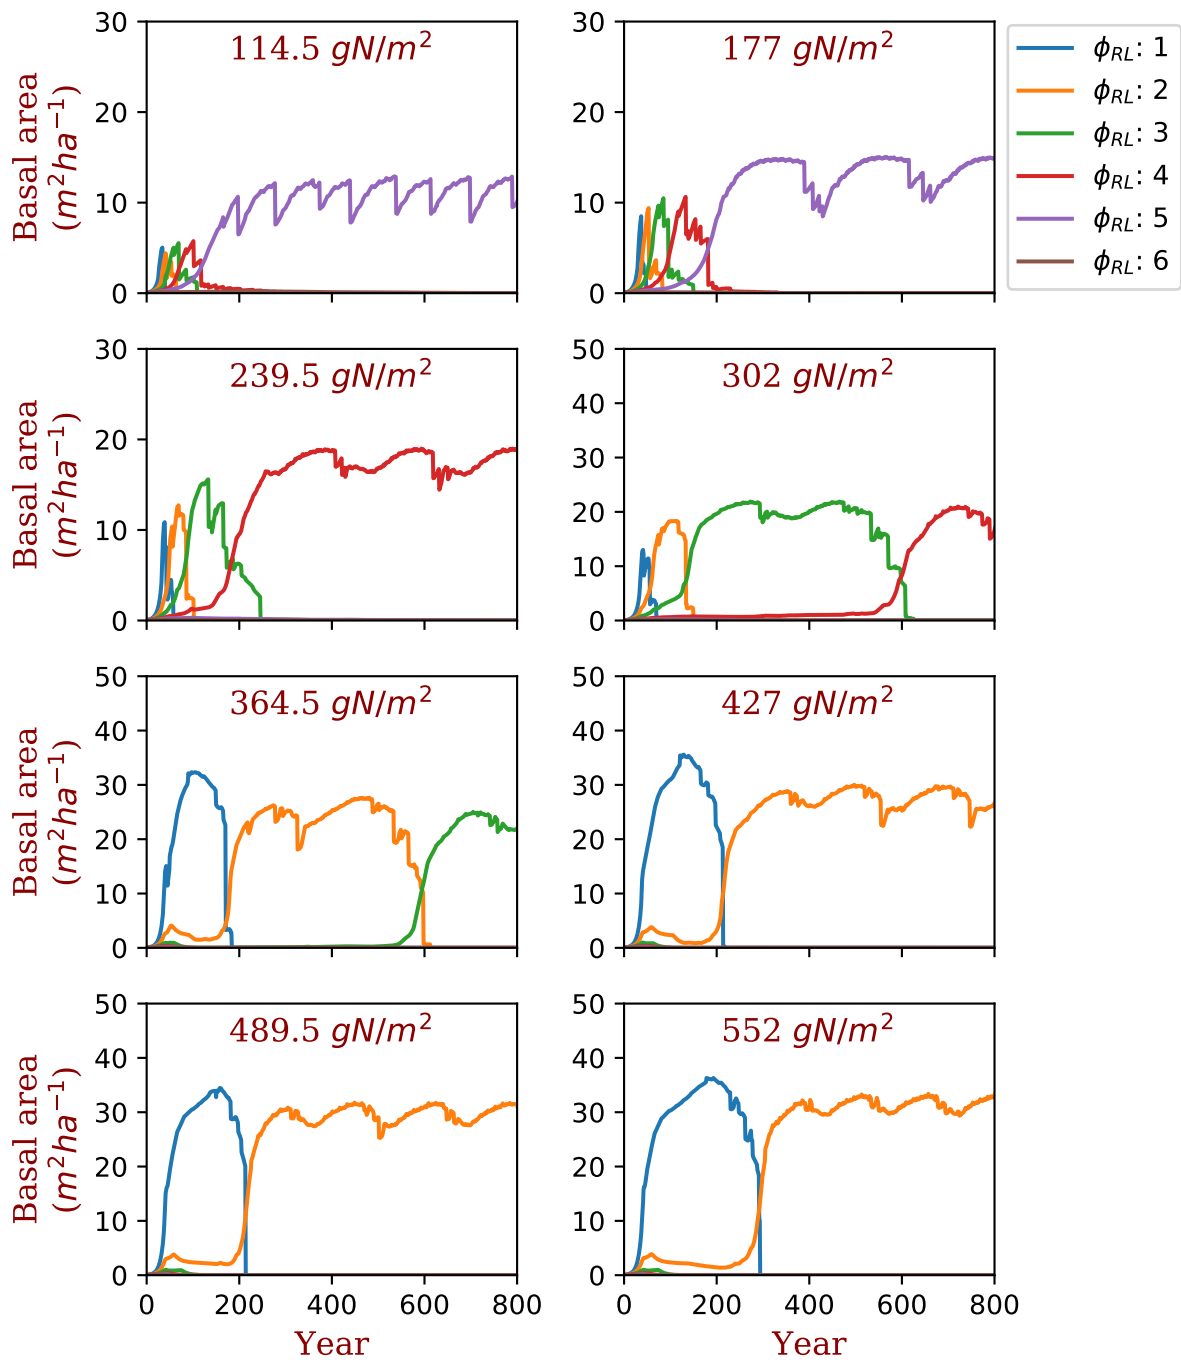

38

39 **Figure S2 Successional patterns of Polyculture runs I at ambient  $[\text{CO}_2]$  (380 ppm).**

40

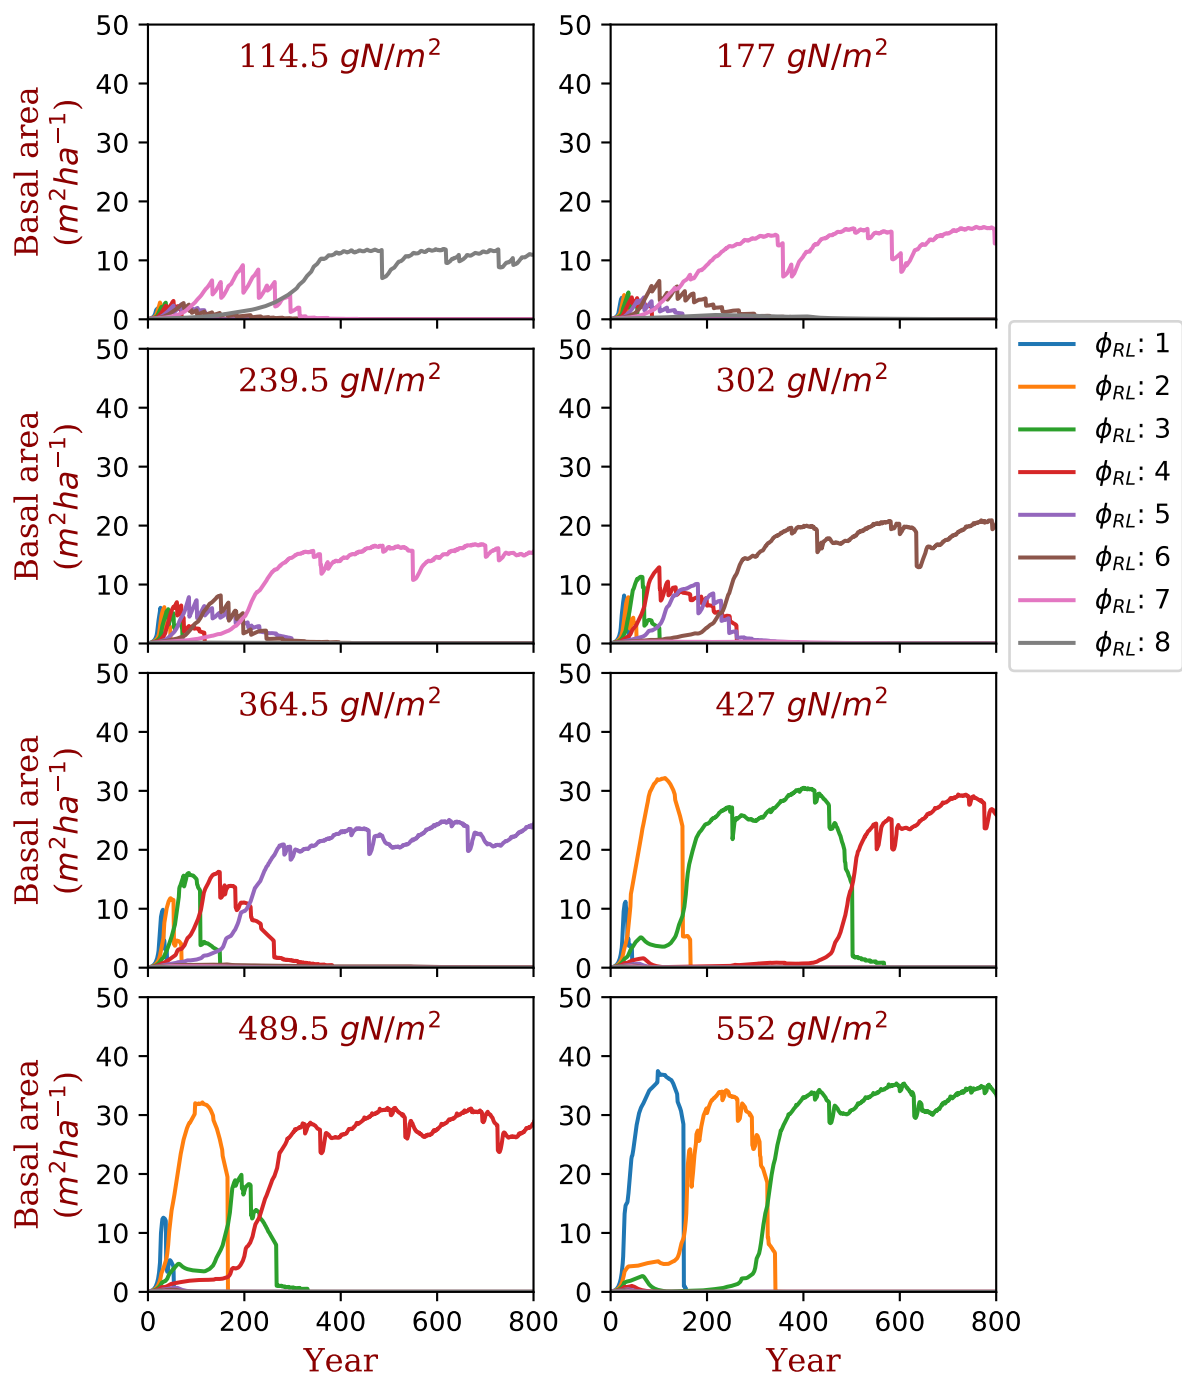

Figure S3 Successional patterns of Polyculture runs I at elevated  $[\text{CO}_2]$  (580 ppm).

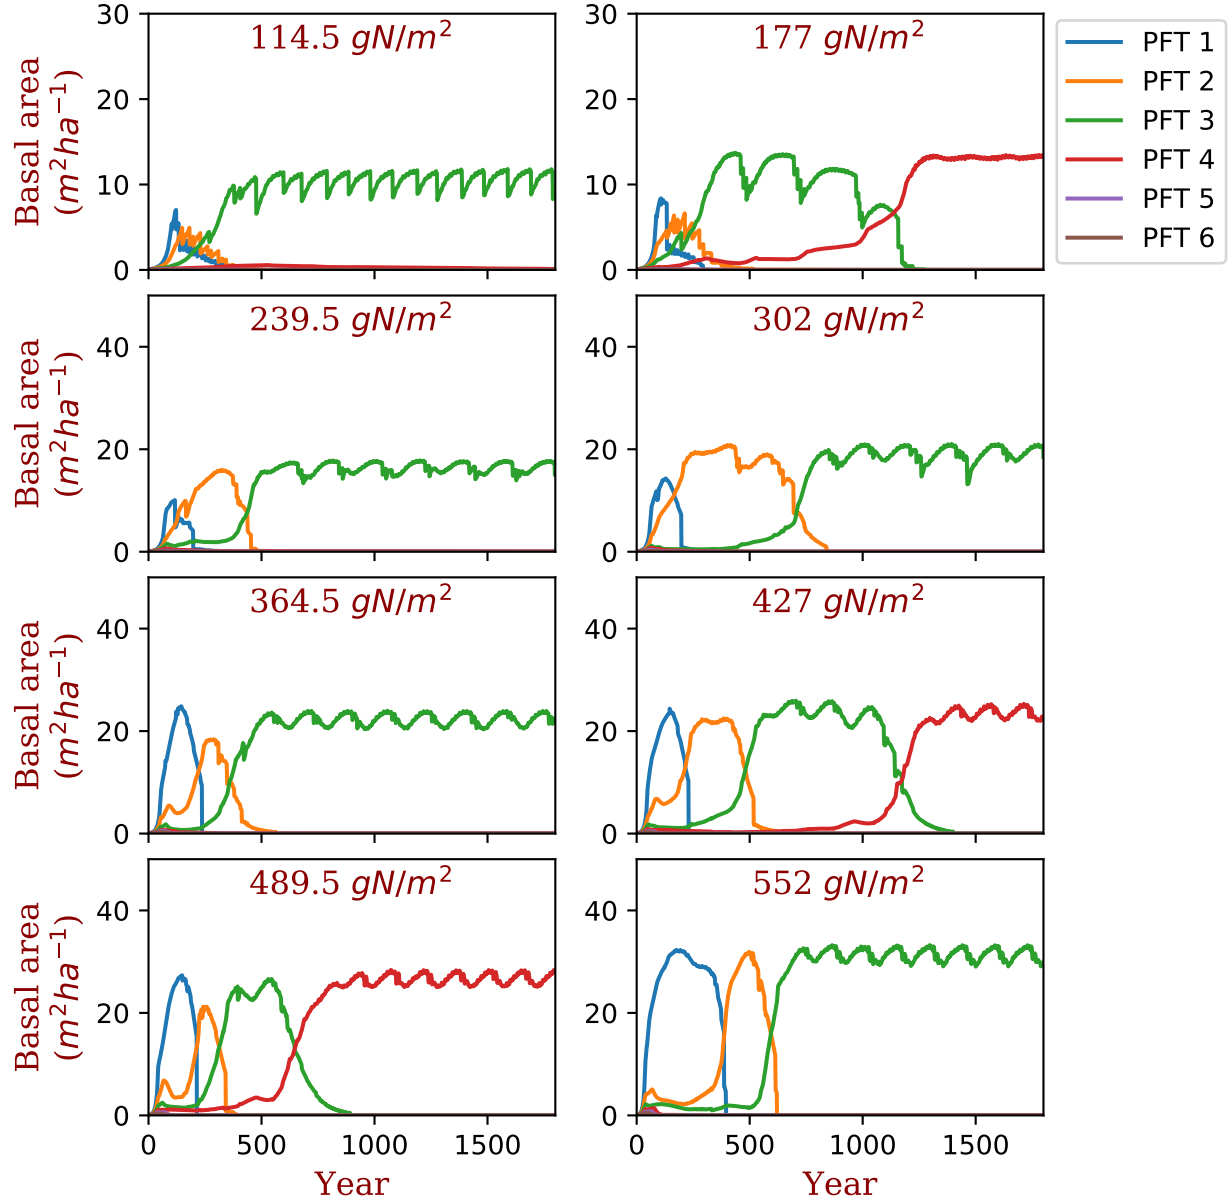

**Figure S4 Successional patterns of polyculture runs II at ambient  $[CO_2]$  (380 ppm).** Let  $i=1, 2, \dots, 8$  denote the eight N levels from 114.5 to 552  $gN\ m^{-2}$ , the  $\varphi_{RL}$  of the six PFTs at each level are  $(5.0-0.5i, 5.5-0.5i, \dots, 7.5-0.5i)$ . For example:

At the nitrogen of 114.5  $gN\ m^{-2}$ , PFTs 1~6 corresponding to the  $\varphi_{RL}$  of 4.5, 5.0, 5.5, ..., 7.0;

At the nitrogen of 177.0  $gN\ m^{-2}$ , PFTs 1~6 corresponding to the  $\varphi_{RL}$  of 4.0, 4.5, 5.0, ..., 6.5;

...

At the nitrogen of 552.0  $gN\ m^{-2}$ , PFTs 1~6 corresponding to the  $\varphi_{RL}$  of 1.0, 1.5, 2.0, ..., 3.5.

52    Winning PFTs at aCO<sub>2</sub> (**red**)

53    114.5 gN m<sup>-2</sup>,  $\varphi_{\text{RL}}$ : 4.5, 5.0, **5.5**, 6.0, 6.5, 7.0, 7.5 8.0;

54    177.0 gN m<sup>-2</sup>,  $\varphi_{\text{RL}}$ : 4.0, 4.5, 5.0, **5.5**, 6.0, 6.6, 7.0, 7.5;

55    239.5 gN m<sup>-2</sup>,  $\varphi_{\text{RL}}$ : 3.5, 4.0, **4.5**, 5.0, 5.5, 6.0, 6.5, 7.0;

56    302.0 gN m<sup>-2</sup>,  $\varphi_{\text{RL}}$ : 3.0, 3.5, **4.0**, 4.5, 5.0, 5.5, 6.0, 6.5;

57    364.5 gN m<sup>-2</sup>,  $\varphi_{\text{RL}}$ : 2.5, 3.0, **3.5**, 4.0, 4.5, 5.0, 5.5, 6.0;

58    427.0 gN m<sup>-2</sup>,  $\varphi_{\text{RL}}$ : 2.0, 2.5, 3.0, **3.5**, 4.0, 4.5, 5.0, 5.5;

59    489.5 gN m<sup>-2</sup>,  $\varphi_{\text{RL}}$ : 1.5, 2.0, 2.5, **3.0**, 3.5, 4.0, 4.5, 5.0;

60    552.0 gN m<sup>-2</sup>,  $\varphi_{\text{RL}}$ : 1.0, 1.5, **2.0**, 2.5, 3.0, 3.5, 4.0, 4.5 .

61

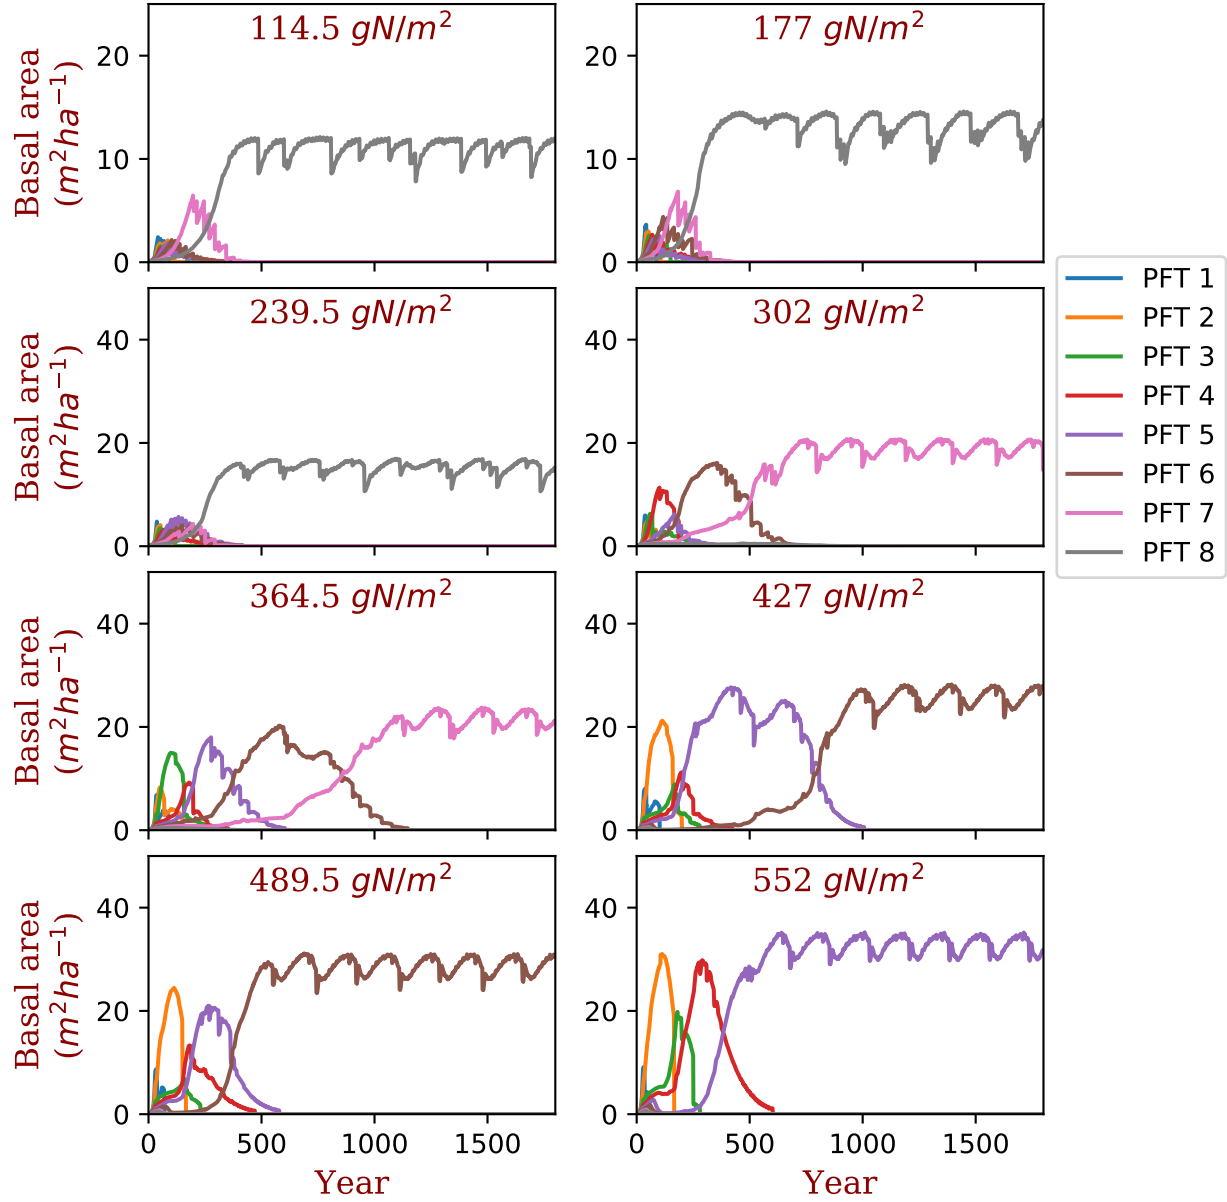

**Figure S5 Successional patterns of polyculture runs II at elevated  $[\text{CO}_2]$  (580 ppm).** Let  $i=1, 2, 3, \dots, 8$  denote the eight N levels from 114.5 to 552  $\text{gN m}^{-2}$ , the  $\varphi_{\text{RL}}$  of the eight PFTs at each level are  $(5.0-0.5i, 5.5-0.5i, \dots, 8.5-0.5i)$ . For example:

At the nitrogen of 114.5  $\text{gN m}^{-2}$ , PFTs 1~8 corresponding to the  $\varphi_{\text{RL}}$  of 4.5, 5.0, 5.5, ..., 8.0;

At the nitrogen of 177.0  $\text{gN m}^{-2}$ , PFTs 1~8 corresponding to the  $\varphi_{\text{RL}}$  of 4.0, 4.5, 5.0, ..., 7.5;

...

At the nitrogen of 552.0  $\text{gN m}^{-2}$ , PFTs 1~8 corresponding to the  $\varphi_{\text{RL}}$  of 1.0, 1.5, 2.0, ..., 4.5.

70    Winning PFTs at eCO<sub>2</sub> (**red**)

71    114.5 gN m<sup>-2</sup>,  $\varphi_{RL}$ : 4.5, 5.0, 5.5, 6.0, 6.5, 7.0, 7.5 **8.0**;

72    177.0 gN m<sup>-2</sup>,  $\varphi_{RL}$ : 4.0, 4.5, 5.0, 5.5, 6.0, 6.6, 7.0, **7.5**;

73    239.5 gN m<sup>-2</sup>,  $\varphi_{RL}$ : 3.5, 4.0, 4.5, 5.0, 5.5, 6.0, 6.5, **7.0**;

74    302.0 gN m<sup>-2</sup>,  $\varphi_{RL}$ : 3.0, 3.5, 4.0, 4.5, 5.0, 5.5, **6.0**, 6.5;

75    364.5 gN m<sup>-2</sup>,  $\varphi_{RL}$ : 2.5, 3.0, 3.5, 4.0, 4.5, 5.0, **5.5**, 6.0;

76    427.0 gN m<sup>-2</sup>,  $\varphi_{RL}$ : 2.0, 2.5, 3.0, 3.5, 4.0, **4.5**, 5.0, 5.5;

77    489.5 gN m<sup>-2</sup>,  $\varphi_{RL}$ : 1.5, 2.0, 2.5, 3.0, 3.5, **4.0**, 4.5, 5.0;

78    552.0 gN m<sup>-2</sup>,  $\varphi_{RL}$ : 1.0, 1.5, 2.0, 2.5, **3.0**, 3.5, 4.0, 4.5 .

79

80



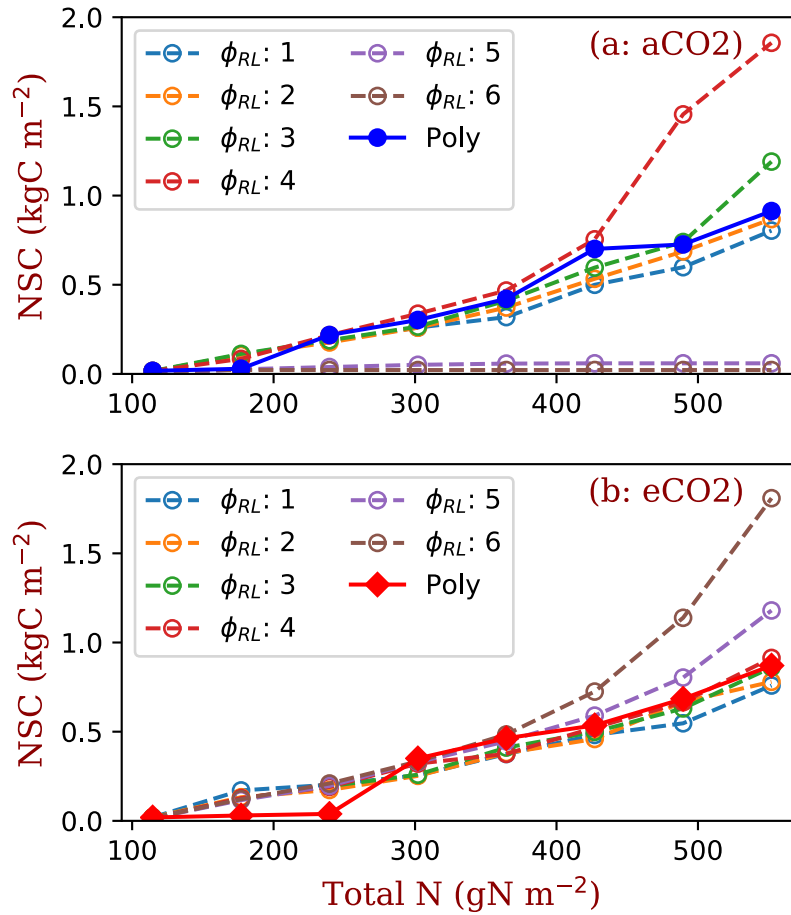

81

82 **Figure S6 Non-structural carbon storage in monoculture and in polyculture runs at**  
83 **equilibrium state.** Panel a is for ambient [CO<sub>2</sub>] and panel b is elevated [CO<sub>2</sub>]. The open symbols  
84 with dashed lines represent monoculture runs The closed symbols with solid line represent  
85 polyculture runs (blue-closed circles are for transpiration at aCO<sub>2</sub> and red-closed diamonds  
86 eCO<sub>2</sub>).

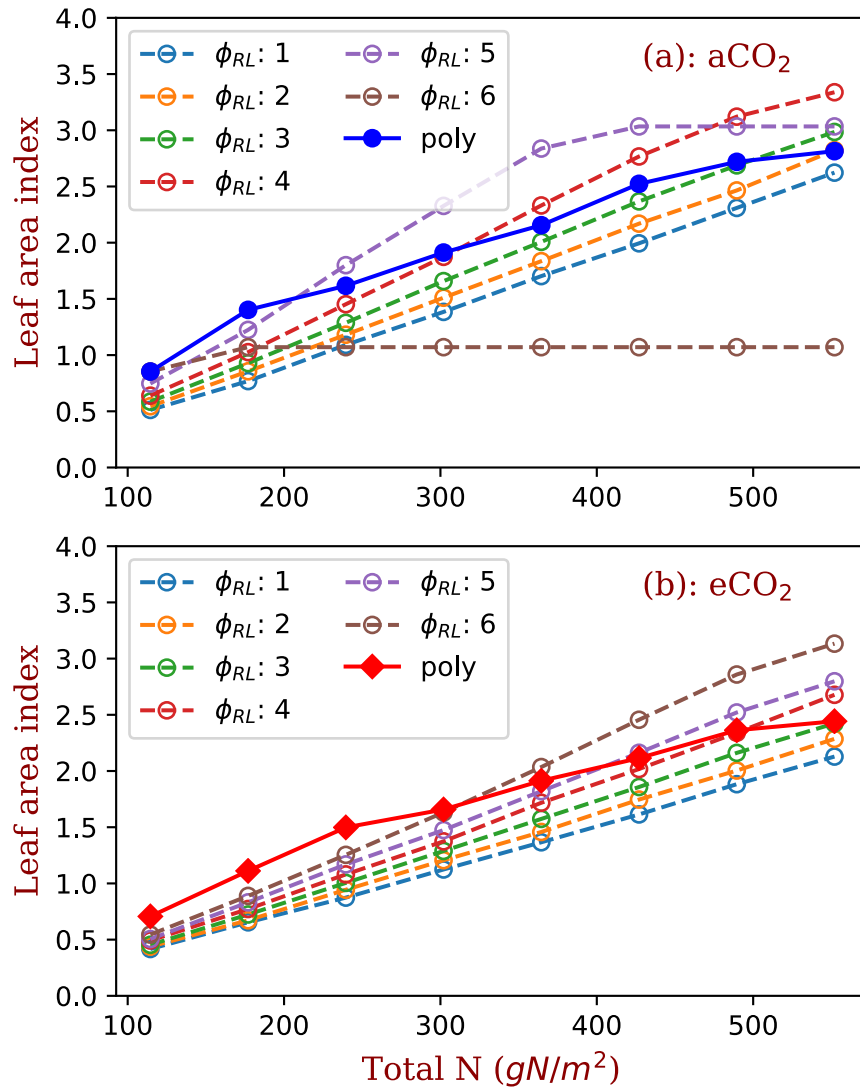

87

88 **Figure S7 Leaf area index in monoculture and in polyculture runs at equilibrium state.**

89 Panel a is for ambient  $[\text{CO}_2]$  and panel b is elevated v. The open symbols with dashed lines

90 represent monoculture runs The closed symbols with solid line represent polyculture runs (blue-

91 closed circles are for transpiration at  $\text{aCO}_2$  and red-closed diamonds  $\text{eCO}_2$ ).

92

93

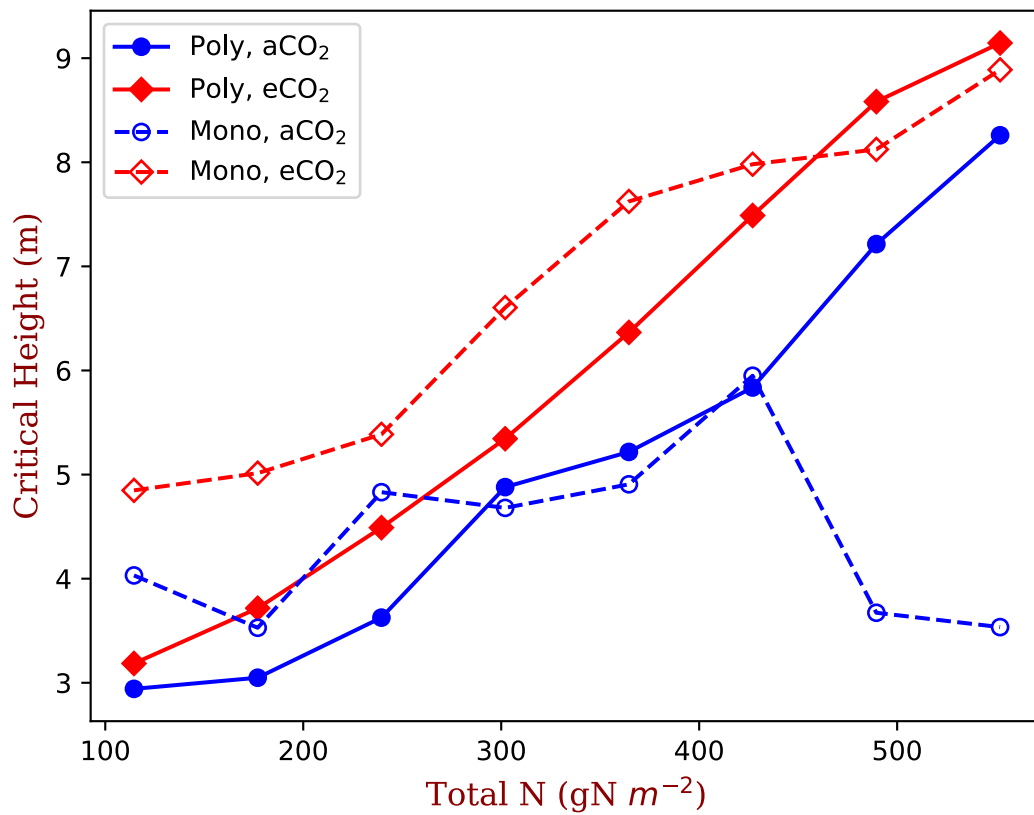

**Figure S8 Critical height of mono- and poly-culture runs at the two [CO<sub>2</sub>] levels (380 ppm and 580 ppm).** The figure shows the data of the averages of the model run years from 1400 and 1800 of the model runs. The closed symbols with solid line represent poly-culture runs (comp.). The open symbols with dashed lines represent mono-culture runs (only the runs of  $\phi_{RL}=4$ ).

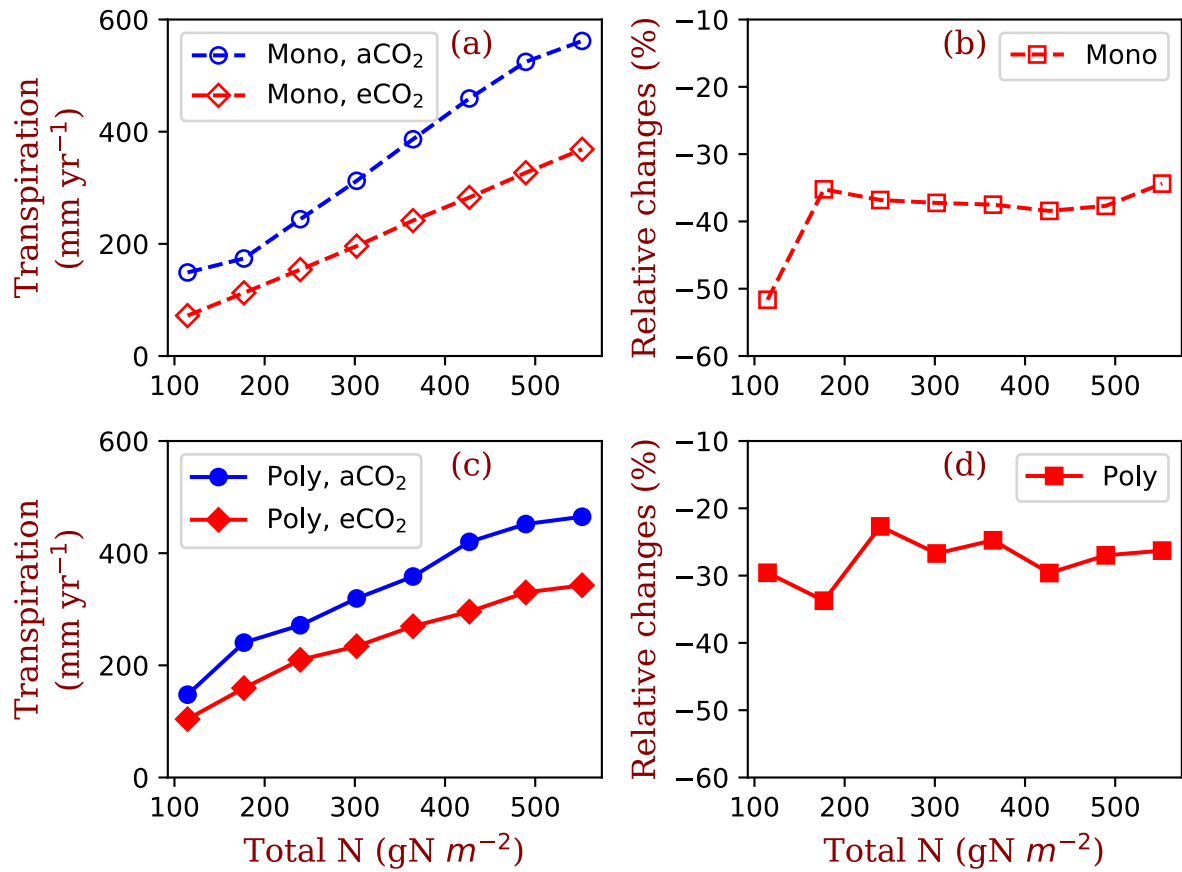

103 **Figure S9 Responses of transpiration to elevated  $[\text{CO}_2]$  in monoculture and in polyculture**

104 **runs.** The open symbols with dashed lines represent monoculture runs (panels a and b, only

105  $\varphi_{\text{RL}}=4$  shown here.). The closed symbols with solid line represent polyculture runs (panels c and

106 d). The relative changes of transpiration at e $\text{CO}_2$  are calculated as:  $100 \times (\text{Transp}_{\text{eCO}_2} - \text{Transp}_{\text{aCO}_2}) /$

107  $\text{Transp}_{\text{aCO}_2}$ .

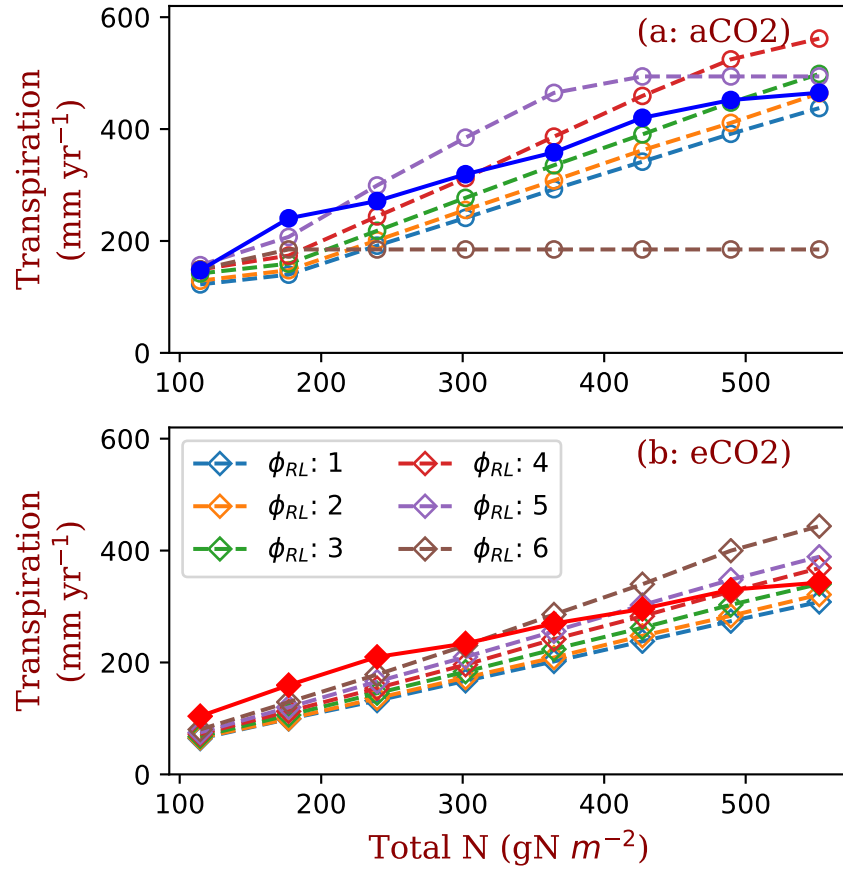

109

110 **Figure S10 Mean annual transpiration in monoculture and in polyculture runs at**  
 111 **equilibrium state.** Panel a is for ambient CO<sub>2</sub> and panel b is elevated CO<sub>2</sub>. The open symbols  
 112 with dashed lines represent monoculture runs The closed symbols with solid line represent  
 113 polyculture runs (blue-closed circles are for transpiration at aCO<sub>2</sub> and red-closed diamonds  
 114 eCO<sub>2</sub>).

115

116

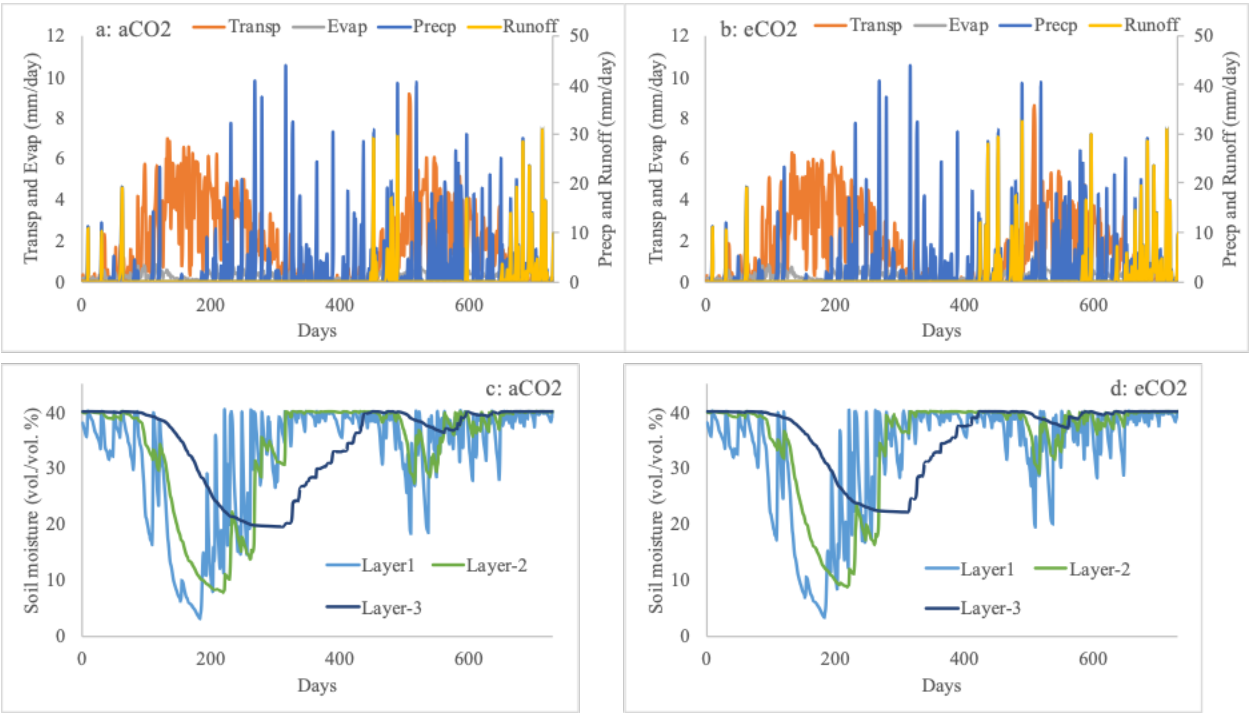

**Figure S11 Water fluxes and soil moisture dynamics.** Two years' daily water dynamics at ambient and elevated [CO<sub>2</sub>], respectively, are shown in this figure, including daily precipitation (Precp), transpiration (Transp), soil surface evaporation (Evap), runoff, soil water content (vol./vol.) in layers 1 (0~0.05 m), 2 (0.05~0.5), and 3 (0.5~1.5 m).
