# Supplementary material for: Competition alters predicted forest carbon cycle responses to nitrogen availability and elevated CO 2 : simulations using an explicitly competitive, game-theoretic vegetation demographic model
Source: Copernicus journal article supplement (doi:10.5194/bg-16-4577-2019), 2019-12-03
Supplement: Supplementary file 4 [file bg-16-4577-2019-supplement.zip]

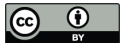

## *Supplement of*

# **Competition alters predicted forest carbon cycle responses to nitrogen availability and elevated CO<sub>2</sub>: simulations using an explicitly competitive, game-theoretic vegetation demographic model**

Ensheng Weng et al.

*Correspondence to:* Ensheng Weng (wengensheng@gmail.com)

- bg-16-4577-2019-supplement-title-page.pdf
- BiomeE-Allocation-SI-I-model.pdf
- BiomeE-Allocation-SI-II-figures.pdf
- \_\_MACOSX
  - .\_BiomeE-Allocation-SI-I-model.pdf
  - .\_BiomeE-Allocation-SI-II-figures.pdf

The copyright of individual parts of the supplement might differ from the CC BY 4.0 License.
