# Supplementary material for: Competition alters predicted forest carbon cycle responses to nitrogen availability and elevated CO 2 : simulations using an explicitly competitive, game-theoretic vegetation demographic model
Source: Copernicus journal article supplement (doi:10.5194/bg-16-4577-2019), 2019-12-03
Supplement: Supplementary file 5 [file bg-16-4577-2019-supplement.zip]

Archive with 6 entries (5 files):
- BiomeE-Allocation-SI-I-model.pdf
- bg-16-4577-2019-supplement-title-page.pdf
- __MACOSX/
- __MACOSX/._BiomeE-Allocation-SI-I-model.pdf
- __MACOSX/._BiomeE-Allocation-SI-II-figures.pdf
- BiomeE-Allocation-SI-II-figures.pdf
